## RESEARCH ARTICLE

# Complex response in size-related traits of bulb mites (*Rhizoglyphus robini*) under elevated thermal conditions – an experimental evolution approach

Agata Plesnar-Bielak\*, Anna Jawor and Paulina E. Kramarz

Institute of Environmental Sciences, Jagiellonian University, Gronostajowa 7, 30-387 Kraków, Poland

\*Author for correspondence (agata.plesnar@uj.edu.pl)

### SUMMARY

Temperature is a key environmental factor affecting almost all aspects of life history in ectotherms. Theory predicts that they grow faster, reach smaller sizes and produce smaller offspring when temperature increases. In addition, temperature changes, through their effects on metabolism, may also influence the expression of alternative reproductive phenotypes (ARPs) in ectotherms. Although many studies have investigated the phenotypic plasticity of life history traits in relation to temperature change, little is known about how those traits and phenotypic plasticity may evolve together. In our study we subjected bulb mites (non-model, soil organisms that normally experience rather stable thermal conditions) to experimental evolution in two temperature treatments: control (24°C) and elevated (28°C). After 18 generations, we measured adult body size, egg size and development time of both treatments at control as well as at elevated temperatures (test temperatures). Thus, we were able to detect genetic changes (the effects of selection temperature) and environmental effects (the effects of test temperature). We also observed the ARP expression throughout the experimental evolution. Our results revealed quite complex patterns of life history in traits response to temperature. Mites developed faster and reached smaller sizes at increased temperature, but evolutionary responses to increased temperature were not always parallel to the observed phenotypic plasticity. Additionally, despite smaller body sizes, females laid larger eggs at higher temperature. This effect was more pronounced in animals evolving at elevated temperature. Evolution at increased temperature also affected ARP expression, with the proportion of armored fighters decreasing from generation to generation. We propose that this could be the consequence of temperature sensitivity of the cost-to-benefits ratio of expressing ARPs.

Key words: thermal plasticity, thermal evolution, experimental evolution, alternative reproductive phenotypes, egg size, development time.

Received 10 May 2013; Accepted 29 August 2013

### INTRODUCTION

Ambient temperature, particularly in ectotherms, is a key environmental factor affecting nearly every aspect of an organism's life history (e.g. Blanckenhorn, 2000) and shaping both evolutionary adaptation and phenotypic plasticity. A well-known example of a phenotypically plastic response to thermal conditions is the temperature–size rule (TSR) (Atkinson, 1994): the increase of body size with decreasing temperature. Similarly, because egg size is related to the body size of the mother and optimal egg size depends on temperature (Perrin, 1988), females at lower temperature are expected to lay fewer but larger eggs (Blanckenhorn, 2001). However, the TSR in arthropods is not universal, as some species exhibit reverse or even more complex temperature–size patterns (e.g. David et al., 2006; Kammenga et al., 2007) and, more importantly, species' geographical clines seem to contrast those of thermal plasticity observed in laboratory studies [e.g. *Drosophila* spp. (Angilletta, 2009)].

Adult size is a product of growth rate and development duration (Davidowitz et al., 2004), and although body size and development time are strongly related to fitness, the extent to which their responses to thermal conditions are mediated by phenotypic plasticity and evolutionary change remains controversial. An experimental evolution approach is potentially a very powerful tool in solving this problem. However, only a few experimental evolution studies have explored the adaptive response of body size (Partridge et al.,

1994; Santos et al., 2006) or development time (Santos et al., 2006; Huey et al., 1991; James and Partridge, 1995) to selection at changed temperature. In addition, the majority of the studies were carried out on *Drosophila*, bringing into question the generality of observed patterns. Even fewer data are available on evolutionary changes in parental investments (egg or offspring size and number). However, it has been observed that changes in egg size with ambient temperature may occur within a single generation, indicating the effect of phenotypic plasticity (Blanckenhorn, 2001). Despite a growing number of studies investigating the selective benefits of egg size at different temperatures (Blanckenhorn, 2000; Fischer et al., 2003; Bownds et al., 2010; Burgess and Marshall, 2011), to our knowledge, only one experiment has attempted to determine whether egg size and phenotypic plasticity for this trait can evolve (Azevedo et al., 1996).

Furthermore, growth rate and development duration differ between the sexes, triggering sexual size dimorphism. Larger body size increases female fecundity, male attractiveness and competitiveness, but when associated with prolonged development, it can expose an individual to external sources of mortality. Males also experience a conflict between selection for rapid development (protandry), often leading to smaller size, and selection for large body size. Interestingly, males and females have been shown to differ in their phenotypic plasticity in body size (Stillwell et al., 2010). Although females are often more plastic than males, the differences

in plasticity may vary between environmental factors as well as within the range of specific environmental variables (Stillwell and Fox, 2009). Therefore, sexes may handle temperature variation differently and the patterns of these differences might not be consistent, differing depending on species, population and temperature range (Stillwell et al., 2010).

Besides sexual size dimorphism, in some species sexes can differ in their expression of discrete morphological variants – so-called alternative reproductive phenotypes (ARPs) – often differing in both growth rate and development time and thus in adult body size. These forms of adaptive phenotypic variants, usually in males, are manifested as morphological differentiation in structures used in male–male competition, such as horns in scarab beetles (Emlen, 1994; Kotiaho and Simmons, 2003) or male leg dimorphism in acarid mites (Woodring, 1969; Radwan, 1995; Radwan, 2001). The shifts in the proportion of ARPs under different thermal conditions are very poorly studied. However, they might be of great importance as such shifts may influence the strength of sexual selection acting in a population at different temperatures, as ARPs differ in their competitiveness. Our study species, the bulb mite *Rhizoglyphus robini* Claparède 1869, has two male morphs with different strategies of reproduction. Fighters, possessing a thickened third pair of legs that is used in fights with other males, are more aggressive and are able to kill rivals, and thus achieve higher reproductive success in mixed populations (Radwan and Klimas, 2001). Scramblers, with ‘normal’ legs, are less aggressive and are harmless to other males (Radwan et al., 2000; Radwan, 2009). Morph expression in *R. robini* is genetically controlled (Radwan, 1995) but also seems to be condition dependent. It has been shown that fighters develop from larger tritonymphs (the last larval stage in bulb mites) and that poor diet suppresses fighter expression (Smallegange, 2011; Radwan, 1995). Hence, through their effects on body size and/or development time, environmental conditions can change the proportion of morphs (Radwan, 1995; Smallegange, 2011; Simpson et al., 2011). Furthermore, a previous study (Shepherd et al., 2008) implied that weapon structure can change body surface and thus may affect fighters’ thermoregulatory behavior and costs of weapon possession.

As a consequence of the above mechanisms, changes in thermal conditions may modify the morph ratio in several ways. First, as fighters develop from larger tritonymphs (Smallegange, 2011), increasing temperature may decrease the ratio of fighters by its effect on body size. What is more, fighting structures can change energy dissipation as a consequence of changes in body surface, as suggested for horn-beetles (Shepherd et al., 2008), even though adult fighters have smaller abdomens than scramblers. Second, temperature is likely to affect the cost of both an aggressive strategy and the production of thickened legs (e.g. Nicleza and Metcalfe, 1999). Because of its energetic costs, it is likely that the fighter strategy may become more costly at high temperature, so only males in particularly good condition would be able to benefit from it. In other words, the switch point between the two morphs may be moved up by a temperature increase.

In the present study we applied an experimental evolution approach where populations of bulb mites *R. robini* were allowed to evolve in two thermal treatments. After 18 generations, the size-related life history traits were measured at both experimental temperatures (elevated and control), which enabled us to distinguish between genetic changes (the effect of selection temperature) and environmental effects (the effect of test temperature). The proportion of fighters was measured throughout 35 generations of the experimental evolution. Thus, the objective of the study was

threefold. First, we compared thermal phenotypic plasticity and evolutionary changes in egg size, development rate and size at maturity. Second, we compared thermal reaction norms for females and males to estimate sex-specific responses to temperature. Third, we assessed how the expression of ARPs had changed during evolution under elevated temperature conditions.

## MATERIALS AND METHODS

### General procedures

Base populations and large mite groups were maintained in plastic containers (2 cm high, 2.5 cm in diameter), whereas individuals and small groups of mites were kept in 0.8 cm diameter glass tubes (2 cm high) with plaster of Paris bases soaked with water. Mites were maintained under >90% humidity and were fed powdered yeast *ad libitum*.

### Base population

The mites used in the experiment originated from a stock culture combined of two populations derived from colonies of *ca.* 200 individuals found on onions in a garden near Kraków, Poland, in 1998 and 2008. Since then, each population had been maintained in the laboratory at large numbers (>1000 individuals). The two populations were mixed approximately 10 generations prior to the beginning of the experimental evolution so as to increase genetic variation, which is crucial in the limited time span of laboratory experiments on multicellular organisms where adaptations arise from standing genetic variation rather than *de novo* mutations (for a review, see Barrett and Schluter, 2007).

### Experimental lines

To test the impact of increased temperature on the evolution of life history traits in the bulb mite, we established five lines that were maintained at 28°C (high temperature; HT lines) and five lines that were kept at 24°C, the temperature to which our base population had been adapted (control temperature; C lines).

Each generation, 20 virgin males and 20 virgin females were placed into one container and left to interact freely for 5 days. After this time, all females within each line were transferred to a common container to lay eggs. Densities of developing larvae and ovipositing females were low in all the lines because of the size of containers. When tritonymphs emerged, *ca.* 80 to 90 of them were isolated in individual glass tubes. Emerging adults were then sexed and each male morph was noted. Twenty individuals of each sex from each line were used to start a new generation.

### Experimental procedures

After 18 generations of experimental evolution, the following life history traits were measured: egg size, adult body size and development time. We established a full two-by-two factorial experimental design so that each line was tested at both temperatures. As female fecundity (the number of eggs) was measured four generations earlier and has been reported in a previous study (Plesnar-Bielak et al., 2012), we decided not to replicate these measurements. Instead, in the present study we discuss changes in egg and body size in the context of fecundity results obtained earlier.

Life history traits were measured in the next generation after transferring mites to the experimental thermal environment to avoid maternal effects caused by developing, mating and ovipositing of females at the selection temperatures. Twenty previously mated females from each line were placed together for 2 days to lay eggs. After this time half of the eggs were put at 24°C and the other half

Table 1. Effects of selection temperature (selection) and test temperature (test) on egg size and female and male body size analyzed using a nested ANOVA

|                     | Egg size |        |        | Female body size |        |        | Male body size |        |        |
|---------------------|----------|--------|--------|------------------|--------|--------|----------------|--------|--------|
|                     | d.f.     | F      | P      | d.f.             | F      | P      | d.f.           | F      | P      |
| Selection           | 1, 8     | 2.070  | 0.188  | 1, 8             | 0.047  | 0.833  | 1, 6           | 0.086  | 0.779  |
| Test                | 1, 267   | 43.802 | <0.001 | 1, 178           | 76.273 | <0.001 | 1, 98          | 18.924 | <0.001 |
| Selection × Test    | 1, 267   | 8.022  | 0.005  | 1, 178           | 0.233  | 0.630  | 1, 98          | 0.574  | 0.451  |
| Line ID (Selection) | 8, 267   | 50.518 | <0.001 | 8, 178           | 6.476  | <0.001 | 6, 98          | 2.995  | 0.010  |
| Error               | 267      | —      | —      | 178              | —      | —      | 98             | —      | —      |

Selection temperature and test temperature are fixed factors; line ID is a random factor nested in selection temperature.

at 28°C to develop. When the eggs developed to the tritonymph stage they were isolated in individual tubes. After reaching adulthood, *ca.* 40 individuals per line per test temperature treatment were put into a common mating vial for 5 days. Then, mated females were transferred to individual tubes and left to lay eggs. Two eggs laid by each female were taken for egg size measurements and some of the others were left to develop and were later isolated in individual tubes (at the tritonymph stage) and left to mature. Emerged adults were used later to measure adult body size and in the development time assay.

Egg size measures

Two eggs laid by each female (total of *ca.* 500 eggs) were photographed using a stereomicroscope (30 times enlargement). The length and width of each egg were measured using ImageJ software (National Institutes of Health, Bethesda, MD, USA) and the mean values for the female were taken to calculate egg volume as  $1/(6\pi w^2l)$  (Smallegange, 2011), where *w* is egg width and *l* is egg length. Egg size was analyzed using a general linear model (GLM) in STATISTICA 10 (StatSoft, Tulsa, OK, USA), with log-transformed mean egg volume for a female as a response variable, selection temperature and test temperature as fixed factors, and line ID nested in selection temperature as a random factor.

Adult body size measures

Two male and two female offspring of each female (see Experimental procedures, above) were photographed using the stereomicroscope and their body length (with absence of mouthparts) was measured using ImageJ software. In the case of males, only scramblers were measured because of very low frequencies of or even no fighters in some of the treatments (see Results, Changes in fighter proportion). Because of technical reasons (small number of individuals available), males from two lines were not included in the analyses, and male and female body sizes were analyzed separately as there were different numbers of male and female lines in the analysis. A GLM was applied, with mean body length as a response variable, selection temperature and test temperature as fixed factors, and line ID nested in selection temperature as a random factor.

Development time measures

Fifteen males and 15 females per line per test temperature (not more than one from each female) were placed together into one container. After 2 days, during which multiple matings took place, females were transferred to fresh containers in which they were allowed to lay eggs. Twenty-four hours after the first eggs were laid, the females were discarded. The containers were checked daily for emerging adults. The number and sex of adults were verified and noted each day. Data were analyzed using a GLM

with sex, selection temperature and test temperature as fixed factors, and line ID nested in selection temperature as a random factor.

Changes in fighter proportion

Numbers of fighters and scramblers were noted each generation while sexing individuals. The proportion of fighters to the total number of males was recorded throughout 35 generations of selection. We performed a repeated-measures ANOVA on square-root-transformed fighter proportions with selection temperature as a predictor and generation as the repeated factor. In this analysis we included the data collected from generations 5, 10, 15, 20, 25, 30 and 35.

RESULTS

Egg size measures

Egg size was affected by test temperature, with larger eggs laid at increased temperature (Table 1, Fig. 1). Although the effect of selection temperature was not significant, its interaction with test temperature significantly influenced egg size (Table 1). At both temperatures, HT females laid smaller eggs than C females, with eggs smaller at 24°C than at 28°C (the temperature at which they evolved; Fig. 1). There was also a significant effect of line ID (Table 1).

Adult body size measures

Body size of both sexes was affected by test temperature (Table 1, Fig. 2). Note also that the decrease in body size with temperature was greater for females (19% decrease) than for males (7%). Neither

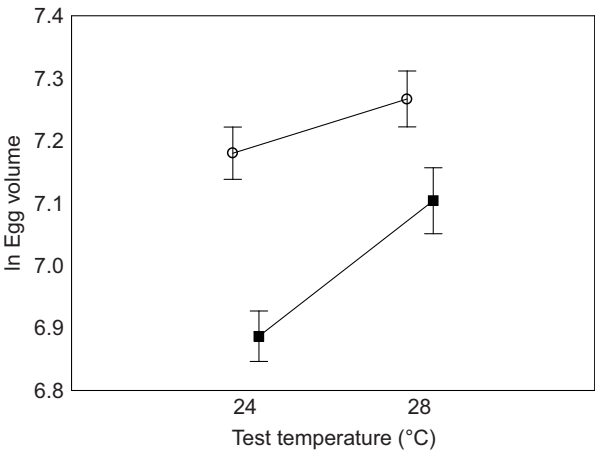

Fig. 1. Mean (ln transformed) volume of eggs at 24 and 28°C in high temperature (HT; black squares) and control (C; white circles) lines of *Rhizoglyphus robini*. Bars denote 95% confidence intervals.

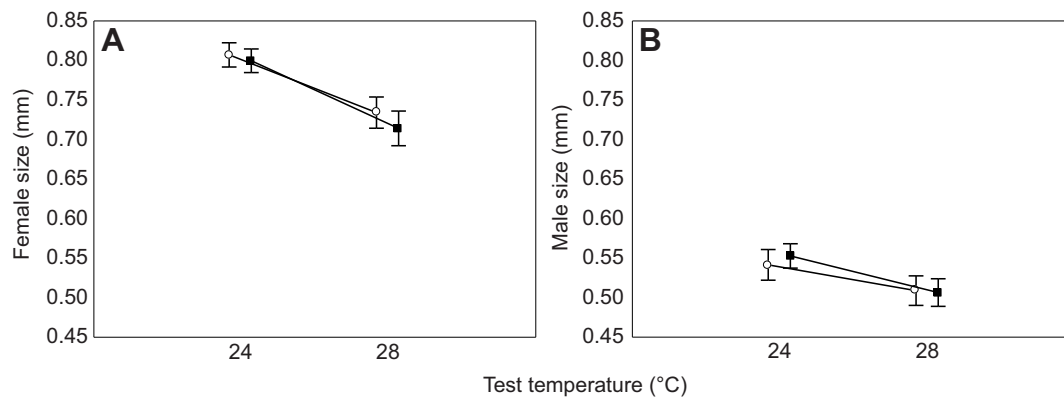

Fig. 2. Mean body size of females (A) and males (B) at 24 and 28°C in HT (black squares) and C (white circles) lines of *R. robini*. Bars denote 95% confidence intervals.

selection temperature nor its interaction with test temperature had a significant effect on body size. There were significant differences in body size of both sexes between the lines (Table 1).

#### Development time measures

Males developed significantly slower than females (Table 2, Fig. 3). Both test temperature and selection temperature, as well as their interaction, affected development time. Development was faster at increased temperature, but HT lines developed slower than C lines, especially at the control temperature. The effect of line ID was also significant (Table 2). No interaction with sex was significant (Table 2). Removing those interactions from the model did not influence the results quantitatively.

#### Changes in fighter proportion

The proportion of fighters decreased from generation to generation in HT lines (Fig. 4). Repeated-measures ANOVA revealed significant effects of selection temperature, generation and, most importantly, their interaction on the proportion of fighters (Table 3).

#### DISCUSSION

We demonstrated differences between evolutionary and plastic responses (the effects of selection *versus* test temperature) of the studied traits to ambient temperature increase. One of the most striking outcomes is the response of egg size to temperature change: eggs laid by HT females were smaller than those laid by C females at both test temperatures. In a previous study (Plesnar-Bielak et al., 2012), it has been shown that both C and HT females laid fewer eggs at increased temperature. Hence, the difference in

egg size between the HT and C lines can be explained by a trade-off between egg number and egg size. This kind of compensation is also supported by the steeper increase of egg size with test temperature in HT lines. Together with HT lines having a fecundity advantage over control lines at the increased temperature (Plesnar-Bielak et al., 2012), our results indicate higher lifetime fitness of HT populations and thus their adaptation to elevated thermal conditions.

A trade-off between the size of eggs and their number is quite common in populations exposed to changing thermal conditions. Similarly to our outcomes, a study by Seko et al. showed that the butterfly *Parnara guttata guttata* laid fewer but larger eggs at higher temperature (Seko et al., 2006). Furthermore, the authors also found that both females and males were smaller at increased temperature. An opposite pattern (more smaller eggs in elevated thermal conditions) has been shown in the amphipod *Gammarus lacustris* (Wilhelm and Schindler, 2000) as well as in tropical butterfly *Bicyclus anynana* (Geister et al., 2008); however, females' investment in progeny was higher at elevated (more beneficial) thermal conditions (Geister et al., 2008).

We did not observe the evolution of either adult body size or phenotypic plasticity of this trait. The relationship between temperature and body size of both males and females was straightforward and followed the TSR (Atkinson, 1994), as mites reached smaller sizes at increased temperature, irrespective of their selection regime. This outcome seems to correspond to development time as all of the lines developed faster when kept at higher temperature (as, in accordance with the TSR, temperature negatively affects development and leads to smaller body size). According to Karl and Fischer (Karl and Fischer, 2008), energy assimilation and its conversion to biomass may increase with temperature, which is followed by faster growth. However, irrespective of thermal conditions, C lines developed faster than HT lines, again supporting the possible evolution of HT populations. An open question remains: why is the direction of an evolutionary response in our populations to development time opposite to the direction of phenotypic plasticity? If longer development of HT lines were a side effect of selective pressure to increase body size, one would expect selection temperature to significantly affect size, which was not the case. Their prolonged development may have been associated with investment into some physiological trait(s) increasing their performance under thermally stressful conditions (Plesnar-Bielak et al., 2012), which might have led to the fecundity advantage demonstrated previously (Plesnar-Bielak et al., 2012), perhaps through higher maternal investment, as observed in *B. anynana* (Geister et al., 2008).

Table 2. Effects of selection temperature (selection) and test temperature (test) and sex on development time analyzed using a nested ANOVA

|                        | d.f.    | F       | P      |
|------------------------|---------|---------|--------|
| Selection              | 1, 8    | 9.672   | 0.014  |
| Test                   | 1, 2939 | 377.605 | <0.001 |
| Sex                    | 1, 2939 | 11.598  | <0.001 |
| Selection × Test       | 1, 2939 | 11.88   | <0.001 |
| Selection × Sex        | 1, 2939 | 0.985   | 0.321  |
| Test × Sex             | 1, 2939 | 0.506   | 0.477  |
| Selection × Test × Sex | 1, 2939 | 1.576   | 0.209  |
| Line ID (Selection)    | 8, 2939 | 22.616  | <0.001 |
| Error                  | 2939    | —       | —      |

Selection temperature, test temperature and sex are fixed factors; line ID is a random factor nested in selection temperature.



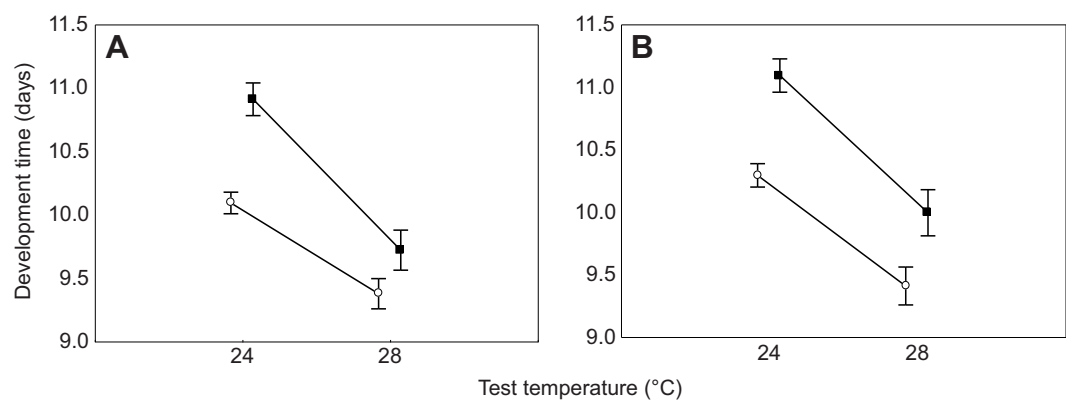

Fig. 3. Mean development time of females (A) and males (B) at 24 and 28°C in HT (black squares) C (white circles) lines of *R. robini*. Bars denote 95% confidence intervals.

In our study, we observed that irrespective of temperate and despite being smaller, males took longer to develop relative to females, which would suggest slower growth rate of males than females. Our results seem to contradict the widely accepted hypothesis explaining sexual size dimorphism – natural selection should favor either protandry (then males should be smaller and develop faster) or synchronized emergence of both sexes (then males should be the size of females). At the same time, although production of sperm is cheaper than that of eggs (Darwin, 1871; Andersson, 1994; Simmons, 2001; Blanckenhorn et al., 2007), the production of gonads may be more costly for males than for females (Reed and Beckage, 1997; Dixon, 2000), which would elongate male development time. In addition, selection pressure for increased body size should be stronger for females than for males (Andersson, 1994; Blanckenhorn et al., 2007), because female fitness depends presumably on fecundity, which in turn depends on size (Honek, 1993; Blanckenhorn et al., 2007). This would explain the observed pattern of sex-related differences in development time. Furthermore, larger individuals may suffer greater heat stress (Blanckenhorn, 2000) because an excess of heat (originating either from metabolic processes or from the environment) in elevated temperature is harder to dissipate (Shepherd et al., 2008). Smaller individuals also need less energy for maintenance, thus they have more energy for any other activities including searching for partners and food, mating, and investment in their sperm supply (Blanckenhorn, 2000).

At the same time, one should keep in mind that for males we examined only scramblers because fighter morphs almost disappeared

in HT lines during the course of the experiment – this is, in fact, one of the most interesting results of our study. The proportion of alternative phenotypic forms can be induced by changes in environmental conditions affecting developmental trajectories (for a review, see Fusco and Minelli, 2010). Indeed, thermal environment affected morph expression in our lines: at increased temperature the proportion of fighters decreased in subsequent generations, whereas it did not change in control lines. As fighters have been shown to develop from larger tritonymphs (Smallegange, 2011), the decrease in the proportion of fighters may be simply an effect of the decrease in body size with temperature. However, if that were the case, the decrease in fighter proportion should be instantaneous, because body size was affected only by the temperature during development (test temperature) and did not evolve during experimental evolution. Another possible explanation is that increased temperature changed the costs-to-benefits ratio of inducing fighter and scrambler morphs or changed the relationship of this ratio with body size and condition. If fighter strategy had become more costly, it might have been beneficial only to males in very high condition. In fact, the costs of expressing fighter strategy are likely to be affected by temperature, as aggressive behavior and long fights consume a lot of energy (Nicieza and Metcalfe, 1999) and the energetic costs of behavioral and physiological traits increase with temperature (Elliot et al., 2005). Indeed, among genes with sex-biased expression, there are more genes expressed only in fighters than in scramblers and, importantly, many of them are metabolically related (M. Stuglik, W. Babik and J. Radwan, unpublished). The increase in the costs of fighter expression may have moved the switch point between the two morphs (the size at which a tritonymph is equally likely to develop into either of the two morphs) towards a bigger size. Estimating the switch point between the morphs in populations evolving at different temperatures as well as measuring relative costs and benefits of expressing both morphs at different temperatures would be needed to further verify this hypothesis.

Overall, our study shows that reaction norms for body size and development time are in line with the TSR predictions, as mites

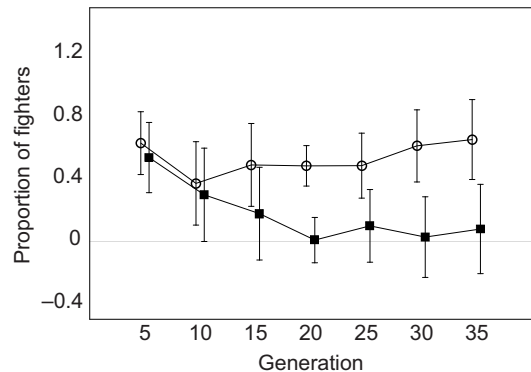

Fig. 4. Mean proportion of fighters measured in generations 5, 10, 15, 20, 25, 30 and 35 in HT (black squares) and C (white circles) lines of *R. robini*. Bars denote 95% confidence intervals.

Table 3. Effects of generation number and selection temperature (selection) on the proportion of fighters analyzed with repeated-measures ANOVA

| Effect                 | d.f.  | F      | P      |
|------------------------|-------|--------|--------|
| Selection              | 1, 7  | 23.766 | 0.002  |
| Generation             | 6, 42 | 6.553  | <0.001 |
| Selection × Generation | 6, 42 | 4.750  | <0.001 |

develop faster and reach smaller sizes at increased temperature. At the same time, we have found that genetic effects of thermal adaptation were not always parallel to the reaction norms. Together with differences between males and females in their phenotypic plasticity in body size, life history traits revealed quite complex patterns of response to the changes in temperatures. We have also demonstrated that evolution at increased temperature affects the expression of ARPs in bulb mites. Although we propose an explanation of the evolutionary mechanism behind this effect (the change of the costs:benefits ratio of expressing a given morph with temperature), testing it would certainly need further investigation.

Two outcomes of our study are rather puzzling. First, despite smaller body sizes, the bulb mite females laid larger eggs at a higher temperature, and the pattern was more striking for lines evolving under elevated thermal conditions (HT lines). Second, males took longer to develop than females, which is in contrast with the commonly accepted hypothesis that natural selection favors either protandry or synchronized emergence of both sexes. Further investigation into egg dry mass and the associated nutritional value, embryonic and larval viability, and fitness of different male morphs at different test and selection temperatures could help solve these questions.

Our study may also help answer the question of adaptability of populations in the face of climate change. Together with the temperature rise observed during the last few decades, climate warming has already caused shifts in the latitudinal ranges and phenology of many species (for a review, see Kingsolver, 2009). At the same time, experimental evolution studies have shown that, at least in the case of microbes, populations are able to adapt to novel thermal conditions, but fitness improvement depends on the temperature range (see Hoffmann and Sgrò, 2011). Bulb mites inhabit rather stable thermal environments as they live in soil (Díaz et al., 2000), and we predict that *R. robini* would be highly thermosensitive (Angilletta, 2009; Kingsolver, 2009). We exposed our populations to quite a substantial temperature increase (4°C), but it remained within their adaptive capacities, as indicated by the evolution of trade-offs between development time and number and size of eggs. We showed that populations can respond to temperature increase by both phenotypic plasticity and complex evolutionary changes depending on the trait under consideration. What is more, we found that adaptation may occur rapidly, allowing populations to survive sudden environmental changes. Interestingly, elevated thermal conditions have also influenced male ARPs, implying that climate warming may affect male competitiveness and sexual selection, and these have been shown to influence the adaptive potential of populations (Plesnar-Bielak et al., 2012).

#### ACKNOWLEDGEMENTS

We thank Jacek Radwan (Adam Mickiewicz University in Poznań, Jagiellonian University), Eoin Duffy (Jagiellonian University), Marcin Czarnolecki (Jagiellonian University), Aleksandra Walczyńska (Jagiellonian University) and two anonymous reviewers for their comments on earlier versions of the manuscript.

#### AUTHOR CONTRIBUTIONS

A.P.-B. developed the concept, A.P.-B. and A.J. performed experiments and data analysis, and A.P.-B. and P.E.K. prepared and edited the manuscript prior to submission.

#### COMPETING INTERESTS

No competing interests declared.

#### FUNDING

The project was supported by grant no. N303 529438 from the Polish Ministry of Science and Higher Education and Jagiellonian University (DS/WBINOZ/INOŚ/762/12).

#### REFERENCES

- Andersson, M. B. (1994). *Sexual Selection*. Princeton, NJ: Princeton University Press.
- Angilletta, M. J., Jr (2009). *Thermal Adaptation. A Theoretical and Empirical Synthesis*. Oxford; New York, NY: Oxford University Press.
- Atkinson, D. (1994). Temperature and organism size: a biological law for ectotherms. *Adv. Ecol. Res.* **25**, 1-58.
- Azevedo, R. B. R., French, V. and Partridge, L. (1996). Thermal evolution of egg size in *Drosophila melanogaster*. *Evolution* **50**, 2338-2345.
- Barrett, R. D. H. and Schluter, D. (2008). Adaptation from standing genetic variation. *Trends Ecol. Evol.* **23**, 38-44.
- Blanckenhorn, W. U. (2000). Temperature effects on egg size and their fitness consequences in the yellow dung fly *Scathophaga stercoraria*. *Evol. Ecol.* **14**, 627-643.
- Blanckenhorn, W. U. (2001). Temperature effects on egg size and their fitness consequences in the yellow dung fly *Scathophaga stercoraria*. *Ecol. Evol.* **14**, 627-643.
- Blanckenhorn, W. U., Dixon, A. F. G., Fairbairn, D. J., Foellmer, M. W., Gibert, P., van der Linde, K., Meier, R., Nylin, S., Pitnick, S., Schoff, C. et al. (2007). Proximate causes of Rensch's rule: does sexual size dimorphism in arthropods result from sex differences in development time? *Am. Nat.* **169**, 245-257.
- Bownds, C., Wilson, R. and Marshall, D. J. (2010). Why do colder mothers produce larger eggs? An optimality approach. *J. Exp. Biol.* **213**, 3796-3801.
- Burgess, S. C. and Marshall, D. J. (2011). Temperature-induced maternal effects and environmental predictability. *J. Exp. Biol.* **214**, 2329-2336.
- Darwin, C. (1871). *The Descent of Man and Selection in Relation to Sex*. London: John Murray.
- David, J. R., Legout, H. and Moreteau, B. (2006). Phenotypic plasticity of body size in a temperate population of *Drosophila melanogaster*: when the temperature-size rule does not apply. *J. Genet.* **85**, 9-23.
- Davidowitz, G., D'Amico, L. J. and Nijhout, H. F. (2004). The effects of environmental variation on a mechanism that controls insect body size. *Evol. Ecol. Res.* **6**, 49-62.
- Díaz, A., Okabe, K., Eckenrode, C. J., Villani, M. G. and O'Connor, B. M. (2000). Biology, ecology, and management of the bulb mites of the genus *Rhizoglyphus* (Acar: Acaridae). *Exp. Appl. Acarol.* **24**, 85-113.
- Dixon, A. F. G. (2000). *Insect Predator-Prey Dynamics: Ladybird Beetles and Biological Control*. Cambridge: Cambridge University Press.
- Elliot, S. L., Horton, C. M., Blanford, S. and Thomas, M. B. (2005). Impacts of fever on locust life-history traits: costs or benefits? *Biol. Lett.* **1**, 181-184.
- Emlen, D. J. (1994). Environmental control of horn length dimorphism in the beetle *Onthophagus acuminatus* (Coleoptera: Scarabaeidae). *Proc. R. Soc. Lond. B* **256**, 131-136.
- Fischer, K., Brakefield, P. M. and Zwaan, B. J. (2003). Plasticity in butterfly egg size: why larger offspring at lower temperatures? *Ecology* **84**, 3138-3147.
- Fusco, G. and Minelli, A. (2010). Phenotypic plasticity in development and evolution: facts and concepts. Introduction. *Philos. Trans. R. Soc. B* **365**, 547-556.
- Geister, T. L., Lorenz, M. W., Meyering-Vos, M., Hoffmann, K. H. and Fischer, K. (2008). Effects of temperature on reproductive output, egg provisioning, juvenile hormone and vitellogenin titres in the butterfly *Bicyclus anynana*. *J. Insect Physiol.* **54**, 1253-1260.
- Hoffmann, A. A. and Sgrò, C. M. (2011). Climate change and evolutionary adaptation. *Nature* **470**, 479-485.
- Honek, A. (1993). Intraspecific variation in body size and fecundity in insects – a general relationship. *Oikos* **66**, 483-492.
- Huey, R. B., Partridge, L. and Fowler, K. (1991). Thermal sensitivity of *Drosophila melanogaster* responds rapidly to laboratory natural selection. *Evolution* **45**, 751-756.
- James, A. C. and Partridge, L. (1995). Thermal evolution of rate of larval development in *Drosophila melanogaster* in laboratory and field populations. *J. Evol. Biol.* **8**, 315-330.
- Kammenga, J. E., Doroszuk, A., Riksen, J. A. G., Hazendonk, E., Spiridon, L., Petrescu, A.-J., Tijsterman, M., Plasterk, R. H. A. and Bakker, J. (2007). A *Caenorhabditis elegans* wild type defies the temperature-size rule owing to a single nucleotide polymorphism in *tra-3*. *PLoS Genet.* **3**, e34.
- Karl, I. and Fischer, K. (2008). Why get big in the cold? Towards a solution to a life-history puzzle. *Oecologia* **155**, 215-225.
- Kingsolver, J. G. (2009). The well-tempered biologist. (American Society of Naturalists Presidential Address). *Am. Nat.* **174**, 755-768.
- Kotiaho, J. S. and Simmons, L. W. (2003). Longevity cost of reproduction for males but no longevity cost of mating or courtship for females in the male-dimorphic dung beetle *Onthophagus binodis*. *J. Insect Physiol.* **49**, 817-822.
- Nicieza, A. G. and Metcalfe, N. B. (1999). Costs of rapid growth: the risk of aggression is higher for fast-growing salmon. *Funct. Ecol.* **13**, 793-800.
- Partridge, L., Barrie, B., Fowler, K. and French, V. (1994). Evolution and development of body size and cell size in *Drosophila melanogaster* in response to temperature. *Evolution* **48**, 1269-1276.
- Perrin, N. (1988). Why are offspring born larger when it is colder? Phenotypic plasticity for offspring size in cladoceran *Simocephalus vetulus* (Müller). *Funct. Ecol.* **2**, 283-288.
- Plesnar-Bielak, A., Skrzynecka, A. M., Prokop, Z. M. and Radwan, J. (2012). Mating system affects population performance and extinction risk under environmental challenge. *Proc. Biol. Sci.* **279**, 4661-4667.
- Radwan, J. (1995). Male morph determination in two species of acarid mites. *Heredity* **74**, 669-673.
- Radwan, J. (2001). Male morph determination in *Rhizoglyphus echinopus* (Acaridae). *Exp. Appl. Acarol.* **25**, 143-149.
- Radwan, J. (2009). Alternative mating tactics in acarid mites. *Adv. Stud. Behav.* **39**, 185-208.
- Radwan, J. and Klimas, M. (2001). Male dimorphism in the bulb mite, *Rhizoglyphus robini*: fighters survive better. *Ethol. Ecol. Evol.* **13**, 69-79.
- Radwan, J., Czyz, M., Konior, M. and Kolodziejczyk, M. (2000). Aggressiveness in two male morphs of the bulb mite *Rhizoglyphus robini*. *Ethology* **106**, 53-62.

- Reed, D. A. and Beckage, N. E.** (1997). Inhibition of testicular growth and development in *Manduca sexta* larvae parasitized by the braconid wasp *Cotesia congregata*. *J. Insect Physiol.* **43**, 29-38.
- Santos, M., Brites, D. and Laayouni, H.** (2006). Thermal evolution of pre-adult life history traits, geometric size and shape and developmental stability in *Drosophila melanogaster*. *J. Evol. Biol.* **19**, 2006-2021.
- Seko, T., Miyatake, T., Fujioka, S. and Nakasuji, F.** (2006). Genetic and environmental sources of egg size, fecundity and body size in the migrant skipper, *Parnara guttata guttata* (Lepidoptera: Hesperidae). *Popul. Ecol.* **48**, 225-232.
- Shepherd, B. L., Prange, H. D. and Moczek, A. P.** (2008). Some like it hot: body and weapon size affect thermoregulation in horned beetles. *J. Insect Physiol.* **54**, 604-611.
- Simmons, L. W.** (2001). *Sperm Competition and its Evolutionary Consequences in the Insects*. Princeton, NJ: Princeton University Press.
- Simpson, S. J., Sword, G. A. and Lo N.** (2011). Polyphenism in insects. *Curr. Biol.* **21**, 738-749.
- Smallegange, I. M.** (2011). Effects of paternal phenotype and environmental variability on age and size at maturity in a male dimorphic mite. *Naturwissenschaften* **98**, 339-346.
- Stillwell, R. C. and Fox, C. W.** (2009). Geographic variation in body size, sexual size dimorphism and fitness components of a seed beetle: local adaptation versus phenotypic plasticity. *Oikos* **118**, 703-712.
- Stillwell, R. C., Blanckenhorn, W. U., Teder, T., Davidowitz, G. and Fox, C. W.** (2010). Sex differences in phenotypic plasticity affect variation in sexual size dimorphism in insects: from physiology to evolution. *Annu. Rev. Entomol.* **55**, 227-245.
- Wilhelm, F. M. and Schindler, D. W.** (2000). Reproductive strategies of *Gammarus lacustris* (Crustacea: Amphipoda) along an elevation gradient. *Funct. Ecol.* **14**, 413-422.
- Woodring, J. P.** (1969). Observations on the biology of six species of acarid mites. *Ann. Entomol. Soc. Am.* **62**, 102-108.
